# Supplementary material
Source: Springer Nature journal article supplement (https://www.springermedizin.de/resource/supplementary/13048_2010_47_MOESM1_ESM.pdf/9664780)

**(a)**

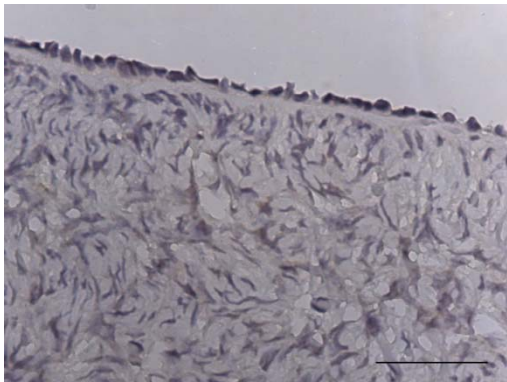

**(b)**

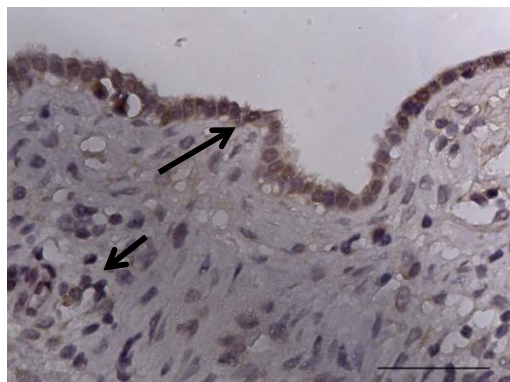

**(c)**

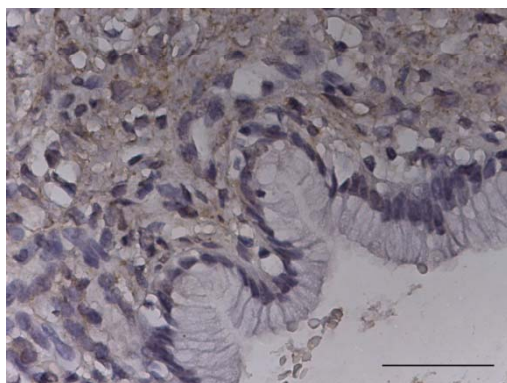

**(d)**

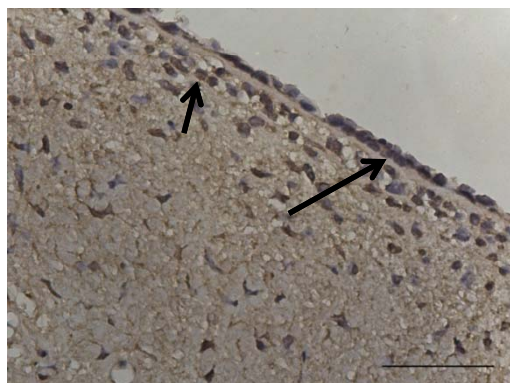

**(e)**

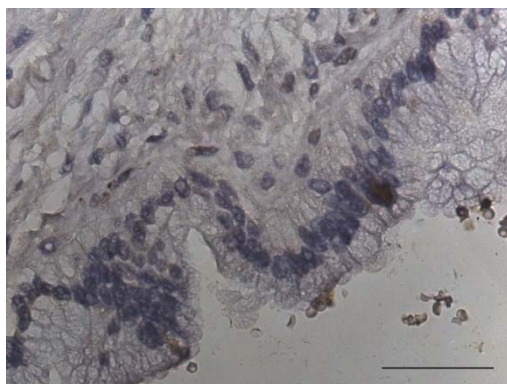

**(f)**

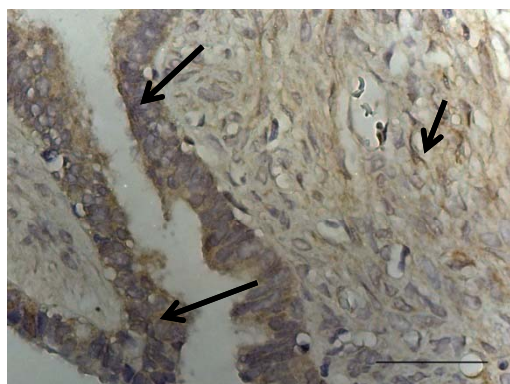

Supplement: MOESM1 [file 9664780]
